# Supplementary material for: Homologous recombination in budding yeast expressing the human RAD52 gene reveals a Rad51-independent mechanism of conservative double-strand break repair
Source: PubMed Central journal article supplement — Nucleic Acids Res. 2016 Dec 6;45(4):1879–88. doi: 10.1093/nar/gkw1228 (PMC5389729; doi:10.1093/nar/gkw1228), 2016-12-06
Supplement: gkw1228_Supp.pdf [file gkw1228_Supp.pdf]

## SUPPLEMENTARY FILES

**Supplementary Table 1 Yeast and human homologous recombination factors**

| FACTOR | HUMAN                                                                    | YEAST                                                                               |
|--------|--------------------------------------------------------------------------|-------------------------------------------------------------------------------------|
| BRCA1  | DSB resection<br>RAD51 loading<br>Conservative HR<br>Non-conservative HR | NA                                                                                  |
| BRCA2  | RAD51 mediator<br>Conservative HR                                        | NA                                                                                  |
| RAD51  | Strand exchange<br>Conservative HR                                       | Strand exchange<br>Conservative HR                                                  |
| RAD52  | Single-strand annealing<br>Conservative HR<br>Non-conservative HR        | Rad51 mediator<br>Single-strand annealing<br>Conservative HR<br>Non-conservative HR |
| RAD54  | RAD51 mediator<br>Conservative HR                                        | Rad51 mediator<br>Conservative HR                                                   |

a NA – Not applicable

**Supplementary Table 2 *Saccharomyces cerevisiae* strains used in this study**

| STRAIN      | GENOTYPE <sup>a</sup>                                                                                                       |
|-------------|-----------------------------------------------------------------------------------------------------------------------------|
| ABX3600     | <i>MATa/α HIS3/his3-11, 15 LEU2/leu2-3, 112 URA3/ura3-1 RAD52/RAD52-FLAG-kanMX ADH1/adh1::HsRAD52-FLAG-kanMX-hygMX-ADH1</i> |
| ABX3566     | <i>MATa/α HIS3/his3-11, 15 URA3/ura3-1</i>                                                                                  |
| ABX3568     | <i>MATa/α HIS3/his3-11, 15 URA3/ura3-1 rad52::TRP1/rad52::TRP1</i>                                                          |
| ABX3569     | <i>MATa/α HIS3/his3-11, 15 URA3/ura3-1 adh1::HsRAD52-hygMX-ADH1/adh1::HsRAD52-hygMX-ADH1</i>                                |
| ABX3570     | <i>MATa/α HIS3/his3-11, 15 URA3/ura3-1 rad52::TRP1/rad52::TRP1 adh1::HsRAD52-hygMX-ADH1/adh1::HsRAD52-hygMX-ADH1</i>        |
| ABX3666-37B | <i>MATa::LEU2 his3-Δ3'-HOcs LEU2-his3-ΔMsc I trp1::GAL-HO-kanMX</i>                                                         |
| ABX3678-49B | <i>MATa::LEU2 his3-Δ3'-HOcs LEU2-his3-ΔMsc I trp1::GAL-HO-kanMX rad51::hisG-URA3-hisG</i>                                   |
| ABX3697-82D | <i>MATa::LEU2 his3-Δ3'-HOcs LEU2-his3-ΔMsc I trp1::GAL-HO-kanMX rad52::TRP1</i>                                             |
| ABX3703-36B | <i>MATa::LEU2 his3-Δ3'-HOcs LEU2-his3-ΔMsc I trp1::GAL-HO-kanMX URA3 adh1::HsRAD52-hygMX-ADH1</i>                           |
| ABX3728-11C | <i>MATa::LEU2 his3-Δ3'-HOcs LEU2-his3-ΔMsc I trp1::GAL-HO-kanMX rad51::LEU2 rad52::TRP1 adh1::HsRAD52-hygMX-ADH1</i>        |
| ABX3728-14A | <i>MATa::LEU2 his3-Δ3'-HOcs LEU2-his3-ΔMsc I trp1::GAL-HO-kanMX rad51::hisG-URA3-hisG rad52::TRP1</i>                       |
| ABX3728-28A | <i>MATa::LEU2 his3-Δ3'-HOcs LEU2-his3-ΔMsc I trp1::GAL-HO-kanMX rad51::hisG-URA3-hisG adh1::HsRAD52-hygMX-ADH1</i>          |

**Supplementary Table 2 *Saccharomyces cerevisiae* strains - continued**

| STRAIN      | GENOTYPE                                                                                                             |
|-------------|----------------------------------------------------------------------------------------------------------------------|
| ABM537      | <i>MATa::LEU2 his3-Δ3'-HOcs LEU2-his3-ΔMsc I trp1::GAL-HO-kanMX rad52::TRP1 adh1::HsRAD52-hygMX-ADH1</i>             |
| ABM562      | <i>MATa::LEU2 his3-Δ3'-HOcs LEU2-his3-ΔMsc I trp1::GAL-HO-kanMX rad54::LEU2</i>                                      |
| ABM563      | <i>MATa::LEU2 his3-Δ3'-HOcs LEU2-his3-ΔMsc I trp1::GAL-HO-kanMX rad52::TRP1 rad54::LEU2 adh1::HsRAD52-hygMX-ADH1</i> |
| ABM564      | <i>MATa::LEU2 his3-Δ3'-HOcs LEU2-his3-ΔMsc I trp1::GAL-HO-kanMX rad54::LEU2 adh1::HsRAD52-hygMX-ADH1</i>             |
| ABM568      | <i>MATa::LEU2 his3-Δ3'-HOcs LEU2-his3-ΔMsc I trp1::GAL-HO-kanMX rad55::LEU2 adh1::HsRAD52-hygMX-ADH1</i>             |
| ABM570      | <i>MATa::LEU2 his3-Δ3'-HOcs LEU2-his3-ΔMsc I trp1::GAL-HO-kanMX rad52::TRP1 rad55::LEU2 adh1::HsRAD52-hygMX-ADH1</i> |
| ABM571      | <i>MATa::LEU2 his3-Δ3'-HOcs LEU2-his3-ΔMsc I trp1::GAL-HO-kanMX rad55::LEU2</i>                                      |
| ABX3761-10C | <i>MATa::LEU2 his3-Δ3'-HOcs LEU2-his3-ΔMsc I trp1::GAL-HO-kanMX rad52::TRP1 adh1::HsRAD52-FLAG-kanMX-hygMX-ADH1</i>  |
| ABX3841-35C | <i>MATa::LEU2 his3-Δ3'-HOcs LEU2-his3-ΔMsc I trp1::GAL-HO-kanMX adh1::HsRAD52-FLAG-kanMX-hygMX-ADH1</i>              |
| W961-5A     | <i>MATa HIS3</i>                                                                                                     |
| ABM559      | <i>MATa::LEU2 his3-Δ3'-HOcs trp1::GAL-HO-kanMX RAD52-FLAG-kanMX</i>                                                  |
| ABX3684-12B | <i>MATa LEU2 rad52::TRP1 adh1::HsRAD52-FLAG-kanMX-hygMX-ADH1</i>                                                     |
| ABT821      | <i>MATa HIS3 pLAY836 (adh1::HsRAD51-MYC URA3)</i>                                                                    |
| ABT822      | <i>MATa::LEU2 his3-Δ3'-HOcs trp1::GAL-HO-kanMX RAD52-FLAG-kanMX pLAY836 (adh1::RAD51-MYC URA3)</i>                   |

**Supplementary Table 2 *Saccharomyces cerevisiae* strains - continued**

| STRAIN      | GENOTYPE                                                                                                                                  |
|-------------|-------------------------------------------------------------------------------------------------------------------------------------------|
| ABT823      | <i>MATa HIS3 pLAY837 (adh1::RAD52-MYC URA3)</i>                                                                                           |
| ABT824      | <i>MATa::LEU2 his3-Δ3'-HOcs trp1::GAL-HO-kanMX RAD52-FLAG-kanMX pLAY837 (adh1::RAD52-MYC URA3)</i>                                        |
| ABT836      | <i>MATa LEU2 rad52::TRP1 adh1::HsRAD52-FLAG-kanMX-hygMX-ADH1 pLAY836 (adh1::RAD51-MYC URA3)</i>                                           |
| ABT838      | <i>MATα LEU2 rad52::TRP1 adh1::HsRAD52-FLAG-kanMX-hygMX-ADH1 pLAY837 (adh1::RAD52-MYC URA3)</i>                                           |
| ABT839      | <i>MATa HIS3 pLAY850 (adh1::HsRAD52-MYC URA3)</i>                                                                                         |
| ABX3834-2D  | <i>MATa::LEU2 his3-Δ3'-HOcs LEU2-his3-ΔMsc I</i>                                                                                          |
| ABX3844-23D | <i>MATa::LEU2 his3-Δ3'-HOcs LEU2-his3-ΔMsc I trp1::GAL-HO-kanMX RAD52-FLAG-kanMX</i>                                                      |
| ABX3879-17B | <i>MATa::LEU2 his3-Δ3'-HOcs LEU2-his3-ΔMsc I trp1::GAL-HO-kanMX rad51::hisG-URA3-hisG RAD52-FLAG-kanMX</i>                                |
| ABX3885-17B | <i>MATa::LEU2 his3-Δ3'-HOcs LEU2-his3-ΔMsc I trp1::GAL-HO-kanMX rad52::TRP1 adh1::HsRAD52-FLAG-kanMX-hygMX-ADH1</i>                       |
| ABX3885-32C | <i>MATa::LEU2 his3-Δ3'-HOcs LEU2-his3-ΔMsc I trp1::GAL-HO-kanMX rad51::hisG-URA3-hisG rad52::TRP1 adh1::HsRAD52-FLAG-kanMX-hygMX-ADH1</i> |
| ABT875      | <i>MATa::LEU2 his3-Δ3'-HOcs LEU2-his3-ΔMsc I trp1::GAL-HO-kanMX rad51::LEU2 RAD52-FLAG-kanMX pLAY606 (URA3)</i>                           |
| ABT876      | <i>MATa::LEU2 his3-Δ3'-HOcs LEU2-his3-ΔMsc I trp1::GAL-HO-kanMX rad51::LEU2 RAD52-FLAG-kanMX pLAY864 (URA3 adh1-HsRAD52-FLAG)</i>         |

<sup>a</sup> All strains are isogenic and possess the following genotype unless otherwise noted: *ade2-1 can1-100 his3-11,-15 leu2-3,-112 trp1-1 ura3-1*



**Supplementary Table 3 Plasmids constructed for this study**

---

| PLASMID | DESCRIPTION                                                                                                                                                       |
|---------|-------------------------------------------------------------------------------------------------------------------------------------------------------------------|
| pLAY606 | <i>ADH1</i> promoter and terminator sequences flanking Not I site in a <i>URA3</i> -marked centromere plasmid                                                     |
| pLAY831 | Coding sequence of <i>RAD51</i> inserted into the multiple cloning sequence of pGBT9                                                                              |
| pLAY832 | Coding sequence of <i>RAD51</i> inserted into the multiple cloning sequence of pGAD424                                                                            |
| pLAY833 | <i>ADH1</i> promoter and terminator sequences flanking Not I site that is in-frame with G8-9MYC epitope tag in the <i>URA3</i> -marked centromere plasmid pLAY606 |
| pLAY836 | Coding sequence of <i>RAD51</i> inserted into pLAY833                                                                                                             |
| pLAY837 | Coding sequence of <i>RAD52</i> inserted into pLAY833                                                                                                             |
| pLAY850 | Coding sequence of <i>HsRAD52</i> inserted into pLAY833                                                                                                           |
| pLAY864 | Coding sequence of <i>RAD52-FLAG</i> placed under the control of the <i>ADH1</i> promoter and terminator in pLAY606                                               |

**Supplementary Table 4 Master Data**

| Genotype                                    | IRR <sup>a</sup>                                               | DSB-EGC <sup>b</sup>                        |
|---------------------------------------------|----------------------------------------------------------------|---------------------------------------------|
| WT                                          | 1.02x10 <sup>2</sup> (0.6, 1.41) <sup>c</sup> [1] <sup>d</sup> | 1.72x10 <sup>-3</sup> (1.37, 2.07) [1]      |
| <i>RAD52-FLAG</i>                           | n.d. <sup>e</sup>                                              | 2.92x10 <sup>-3</sup> (1.87, 3.96) [+1.7]   |
| <i>HsRAD52</i>                              | 8.6x10 <sup>1</sup> (7.4, 17.9) [-1.2]                         | 2.32x10 <sup>-3</sup> (1.68, 2.97) [+1.4]   |
| <i>rad51Δ</i>                               | n.d.                                                           | 4.76x10 <sup>-6</sup> (1.62, 5.13) [-361]   |
| <i>rad51Δ RAD52-FLAG</i>                    | n.d.                                                           | 7.58x10 <sup>-6</sup> (6.28, 8.87) [-227]   |
| <i>rad51Δ RAD52-FLAG/</i><br><i>pLAY606</i> | n.d.                                                           | 2.17x10 <sup>-5</sup> (0.49, 3.86) [-79]    |
| <i>rad51Δ RAD52-FLAG/</i><br><i>pLAY864</i> | n.d.                                                           | 1.21x10 <sup>-5</sup> (0.24, 2.18) [-142]   |
| <i>rad51Δ HsRAD52</i>                       | n.d.                                                           | 1.19x10 <sup>-4</sup> (0.99, 1.39) [-14.5]  |
| <i>rad52Δ</i>                               | 4.22x10 <sup>-1</sup> (1.9, 8.99) [-242]                       | 9.21x10 <sup>-7</sup> (6.52, 11.90) [-1868] |
| <i>rad52Δ HsRAD52</i>                       | 4.6 (3.4, 6.1) [-22]                                           | 7.20x10 <sup>-5</sup> (5.73, 8.68) [-23.9]  |
| <i>rad52Δ HsRAD52-FLAG</i>                  | n.d.                                                           | 3.96x10 <sup>-5</sup> (1.13, 6.79) [-43]    |
| <i>rad54Δ</i>                               | n.d.                                                           | 3.47x10 <sup>-5</sup> (2.60, 4.30) (-49.6)  |
| <i>rad54Δ HsRAD52</i>                       | n.d.                                                           | 4.87x10 <sup>-5</sup> (3.41, 6.33) [-35.3]  |
| <i>rad55Δ</i>                               | n.d.                                                           | 9.81x10 <sup>-5</sup> (8.88, 10.75) [-17.5] |
| <i>rad55Δ HsRAD52</i>                       | n.d.                                                           | 9.98x10 <sup>-5</sup> (6.47, 13.50) [-17.2] |
| <i>rad51Δ rad52Δ</i>                        | n.d.                                                           | 6.69x10 <sup>-8</sup> (4.29, 9.10) [-25710] |
| <i>rad51Δ rad52Δ HsRAD52</i>                | n.d.                                                           | 5.77x10 <sup>-5</sup> (3.85, 7.68) [-29.8]  |
| <i>rad52Δ rad54Δ HsRAD52</i>                | n.d.                                                           | 1.26x10 <sup>-5</sup> (1.11, 1.41) [-136.5] |
| <i>rad52Δ rad55Δ HsRAD52</i>                | n.d.                                                           | 5.25x10 <sup>-5</sup> (1.65, 8.86) [-32.8]  |

<sup>a</sup> Ionizing Radiation Resistance (% viable cells)

<sup>b</sup> Double-strand Break Stimulated Ectopic Gene Conversion Frequency (recombinants/viable cell)

<sup>c</sup> 95% confidence interval

<sup>d</sup> Fold difference from wild-type

<sup>e</sup> Not Determined

|           |             |             |             |             |             |              |                |
|-----------|-------------|-------------|-------------|-------------|-------------|--------------|----------------|
|           |             | 20          |             | 40          |             | 60           |                |
| ScRAD52   | MN---       | EIMD        | MDEKKPVFGN  | HS-----     | -----EDIQ   | TKLDKKLGPE   | YISKRVGFGT 42  |
| HsRAD52   | MSGTEEA     | ILG         | GRDSHPAAGG  | GSVLCFGQCQ  | YTAEYQA IQ  | KALRQLGPE    | YISSRMAGGG 60  |
| Consensus | M*GTEE*     | **          | *****P**G*  | *SVLCFGQCQ  | YTAEY**IQ   | **L***LGPE   | YIS*R***G*     |
|           |             | 80          |             | 100         |             | 120          |                |
| ScRAD52   | SR IAY      | IEGWR       | VINLANQIFG  | YNGWSTEVKS  | VV IDFLDERQ | GKFS IGCTA I | VRVTLTSGTY 102 |
| HsRAD52   | QKVCY       | IEGHR       | VINLANEMFG  | YNGWAHSITQ  | QNVDFVDLNN  | GKFYVGVCAF   | VRVQLKDGSY 120 |
| Consensus | ****Y       | IEG*R       | VINLAN**FG  | YNGW*****   | ***DF*D**   | GKF**G**A*   | VRV*L**G*Y     |
|           |             | 140         |             | 160         |             | 180          |                |
| ScRAD52   | RED IGYGTV  | E           | NERRKPAAFE  | RAKKS AVTDA | LKRS LRGFN  | ALGNCLYDKD   | FLAKIDKVKF 162 |
| HsRAD52   | HEDVGYGVSE  | E           | GLKSKALSLE  | KARKEAVTDG  | LKRALRSFGN  | ALGNCLDKD    | YLRSLNKLPR 180 |
| Consensus | *ED*GYG**E  |             | ****K****E  | *A*K*AVTD*  | LKR*LR*FGN  | ALGNC**DKD   | *L****K***     |
|           |             | 200         |             | 220         |             | 240          |                |
| ScRAD52   | DPP -DFDENN | LFRPTDEIS-  | ESSRTNTLHE  | NQEQQQYPNK  | RRQLTKVTNT  | NPDSTKNLVK   | 220            |
| HsRAD52   | QLPLEVDLTK  | AKRQDLEPSV  | EEARYNSCRP  | NMALG-HP--  | --QLQQVTS-  | -PSRPSHAV-   | 232            |
| Consensus | **PL**D***  | **R***E*SV  | E**R*N****  | N****Q*PNK  | RRQL**VT* T | NP*****VK    |                |
|           |             | 260         |             | 280         |             | 300          |                |
| ScRAD52   | IENTVSRGTP  | MMAAPAEANS  | KNSSNKDIDL  | KSLDASKQDQ  | DDLDDSLMF   | SDDFQDDDL I  | 280            |
| HsRAD52   | -----       | -IPADQDCSS  | RSLSSAVES   | EATHQRKLRQ  | KQL-----    | QQQFRE----   | 270            |
| Consensus | IENTVSRGTP  | M**A*****S  | ***S*****   | *****K**Q   | **LLDDSLMF  | ***F**DDL I  |                |
|           |             | 320         |             | 340         |             | 360          |                |
| ScRAD52   | NMGNTNSNVL  | TTEKDPVVAK  | QSPTASSNPE  | AEQITFVTAK  | AATSVQNERY  | IGEES I FDPK | 340            |
| HsRAD52   | RMEKQQRVS   | TPS-----AE  | KSEAAPPAPP  | VTHSTPVTVS  | -----       | ---EPLLEKD   | 312            |
| Consensus | *M*****V*   | T**KDPVVA*  | *S**A***P*  | ****T*VT**  | AATSVQNERY  | IGEE*****    |                |
|           |             | 380         |             | 400         |             | 420          |                |
| ScRAD52   | YQA-- -QSIR | HTVDQTTSKH  | IPASVLKDKT  | MTTARDSVYE  | KFAPKKGKLS  | MKNNDKELGP   | 397            |
| HsRAD52   | FLAGVTQELI  | KTLEDNSEKW  | ---AVTPD--  | ---AGDGVVK  | ---PSSRADP  | AQTS DTL---  | 358            |
| Consensus | **AGVTQ***  | *T*****K*   | IPAV**DKT   | MTTA*D*V**  | KFAP*****   | ****D**LGP   |                |
|           |             | 440         |             | 460         |             | 480          |                |
| ScRAD52   | HMLEGAGNQV  | PRETTP IKTN | ATAFPPAAAP  | RFAPPSKVVH  | PNGNGAVPAV  | P-QQRSTRRE   | 456            |
| HsRAD52   | ----ALNNQM  | -----VTQN   | RT---PHSVC  | HQKPAK---   | -SGSWDLQTY  | SADQRTTGNW   | 401            |
| Consensus | HMLE***NQ*  | PRETTP***N  | *TAFPP***** | ***P**KVVH  | P*G*****    | *A*QR*T***   |                |
|           |             |             |             |             |             |              |                |
| ScRAD52   | VGRP KINPLH | ARK--PT     |             |             |             |              | 471            |
| HsRAD52   | ESHRKSQDMK  | KRKYDPS     |             |             |             |              | 418            |
| Consensus | ****K*****  | *RKYDP*     |             |             |             |              |                |

**Supplementary Figure 1: Alignment of primary amino acid sequences of yeast and human RAD52** The amino acid sequences of Rad52 and HsRad52 were aligned using the CLC Sequence Viewer (CLC Bio, Aarhus, Denmark). identical residues are highlighted in blue.

A.

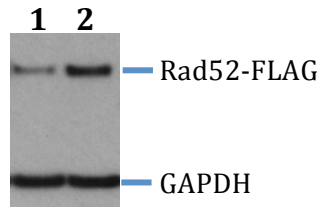

B.

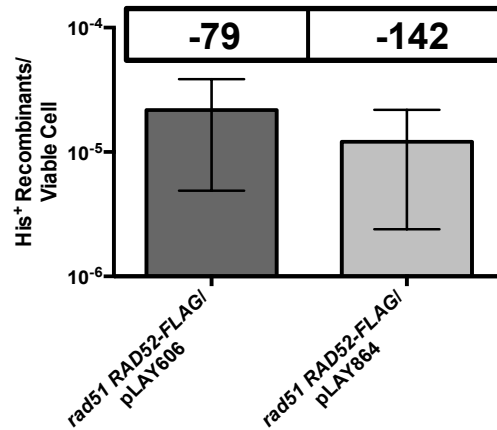

**Supplementary Figure 2: Supplementary expression of *RAD52-FLAG* in a *rad51* mutant strain fails to stimulate frequencies of ectopic gene conversion**

A. Western blot of strains containing plasmids that do, or do not facilitate expression of *RAD52-FLAG*

A haploid *rad51 RAD52-FLAG* strain was transformed with either pLAY606 (empty expression vector) or pLAY864 (expressing *RAD52-FLAG*). Aliquots of whole cell extracts were separated on gels, electroblotted, and probed with anti-FLAG or anti-GAPDH antibodies. Signals corresponding to the 55 kDa Rad52-FLAG and 37 kDa GAPDH proteins are denoted on the right side of the figure. Lanes: 1 – ABT875 (*rad51 RAD52-FLAG/pLAY606*); 2 – ABT876 (*rad51 RAD52-FLAG/pLAY864*)

B. EGC assays with strains containing plasmids that do, or do not facilitate expression of *RAD52-FLAG*

Single colonies of each strain were used to inoculate at least 10 one milliliter SD-Ura Glycerol/Lactate cultures and grown overnight. After inducing HO endonuclease cells were plated onto YPD to determine viability and SD-His to select for recombinants. Frequencies of EGC were determined by dividing the number of recombinants by the number of cells plated. Mean recombination frequencies and 95% confidence levels were plotted. Fold differences below wild-type are indicated in the boxes. Strains used in this analysis: ABT875 (*rad51 RAD52-FLAG/pLAY606*); ABT876 (*rad51 RAD52-FLAG/pLAY864*)

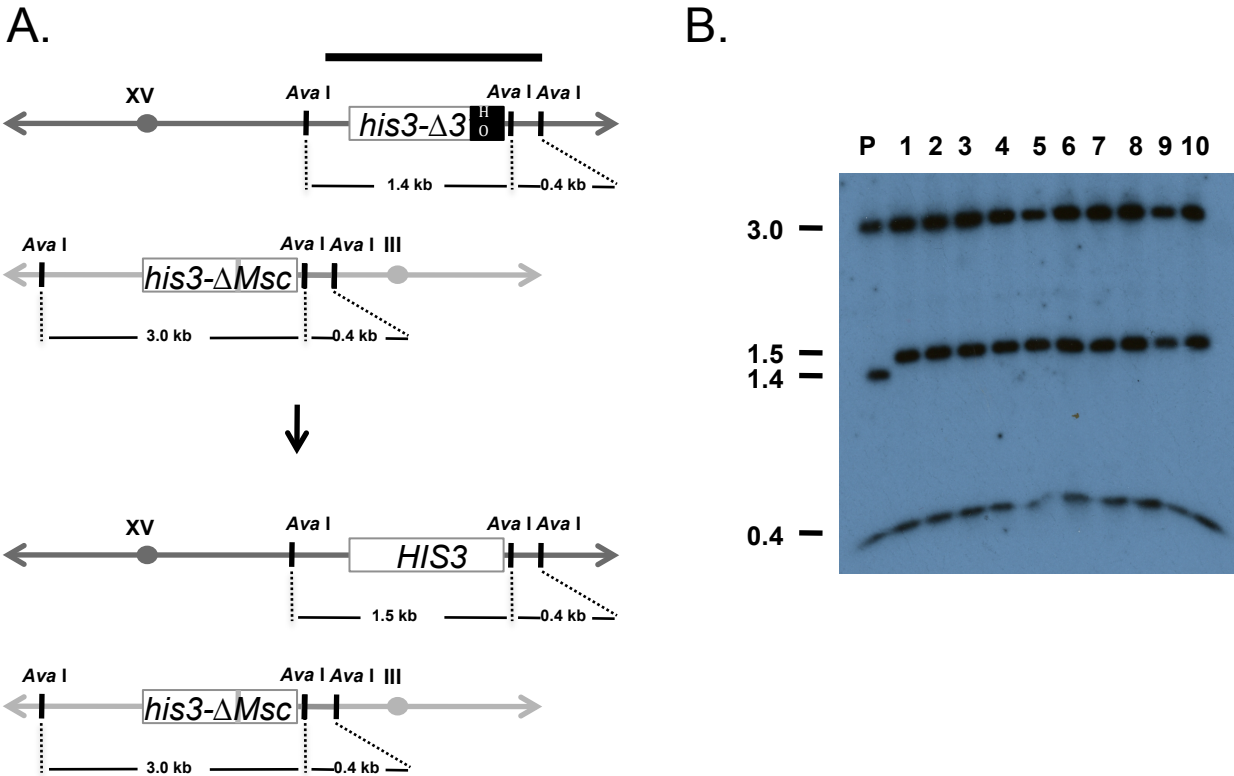

### Supplementary Figure 3: Detailed analysis of the *his3* ectopic gene conversion assay

**A.** Graphic depiction of the *his3* ectopic gene conversion assay components. The *his3-Δ3'*-*HOcs* substrate (white "*his3Δ-3'*" box) at the *HIS3* locus on chromosome XV (dark gray double ended arrow) substitutes a 127 bp DNA fragment containing an HO cut site (black "HO" box) for 238 bp of the 3' end of the *HIS3* coding sequence and flanking DNA. The *his3-ΔMsc I* substrate (white "*his3-ΔMsc I*" box) at the *LEU2* locus on chromosome III (light gray double ended arrow) is comprised of a 1.8 kb genomic clone containing the *HIS3* gene that has been disrupted by the insertion of a 10 bp *Not I* linker into the *Msc I* site in the coding sequence. Repair of an HO-catalyzed DSB at the *his3-Δ3'*-*HOcs* substrate by unidirectional transfer of information from the *his3-ΔMsc I* substrate (black arrow) creates an intact *HIS3* gene. The genomic sequence corresponding to the probe used to reveal the *his3* sequences in the genomic Southern blot is indicated by the solid black line above the white *his3Δ-3'* box. The positions of the *Ava I* restriction sites flanking the *his3Δ-3'* and *his3-ΔMsc I* substrates, and their distances from one another in kb are depicted.

**B.** Genomic Southern blot of parental and recombinant strains. Genomic DNA prepared from a His<sup>-</sup> parental strain, and 10 independent His<sup>+</sup> recombinants was digested with *Ava I* restriction endonuclease, run on an agarose gel, electroblotted to nylon, probed with a <sup>32</sup>P-labeled *HIS3* sequence, and complementary sequences visualized by exposure to X-ray film. Lanes carrying DNA from His<sup>-</sup> parental (P) and His<sup>+</sup> recombinant (1-10) strains are marked at the top of the figure. Positions of the 1.4 and 0.4 kb *his3-Δ3'* substrate bands, 3.0 and 0.4 kb *his3-ΔMsc I* bands, and 1.5 and 0.4 kb *HIS3* recombinant product bands are denoted on the left side of the figure.

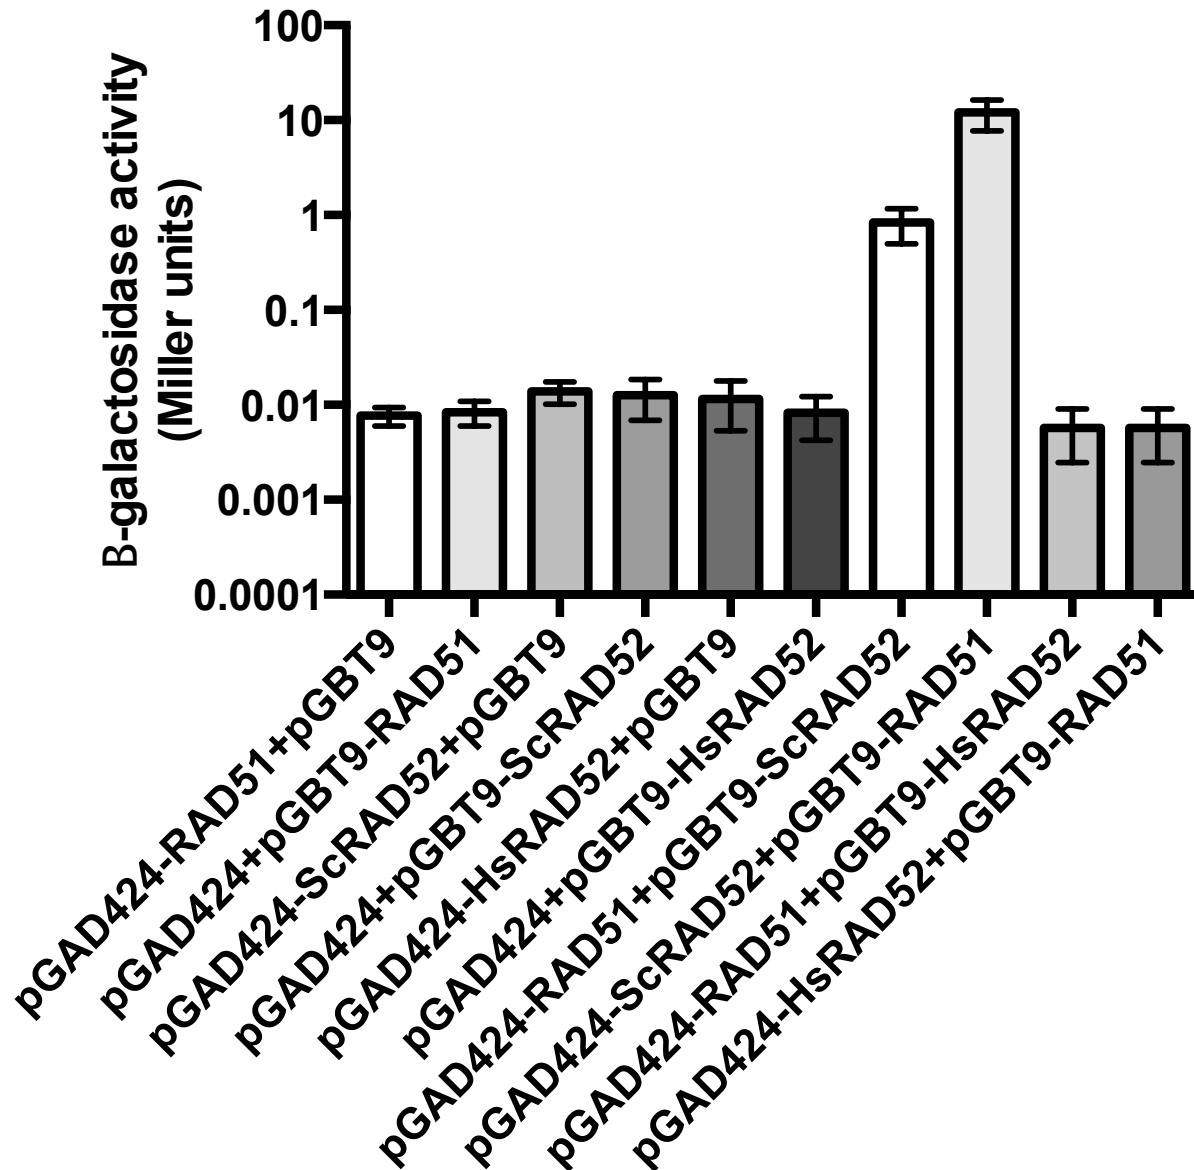

**Supplementary Figure 4: Yeast two-hybrid studies of interactions between Rad51, and Rad52 or HsRAD52**

The yeast strain Y187 was transformed with the plasmids pGBT9 and pGAD424, or their derivatives containing *RAD51*, *RAD52*, or *HsRAD52* sequences and grown on synthetic complete medium lacking leucine and tryptophan from which whole cell extracts prepared.  $\beta$ -galactosidase specific activities, in Miller units were determined in the extracts of a minimum of 10 independent cultures of each transformant. Mean specific activities and 95% confidence are plotted.

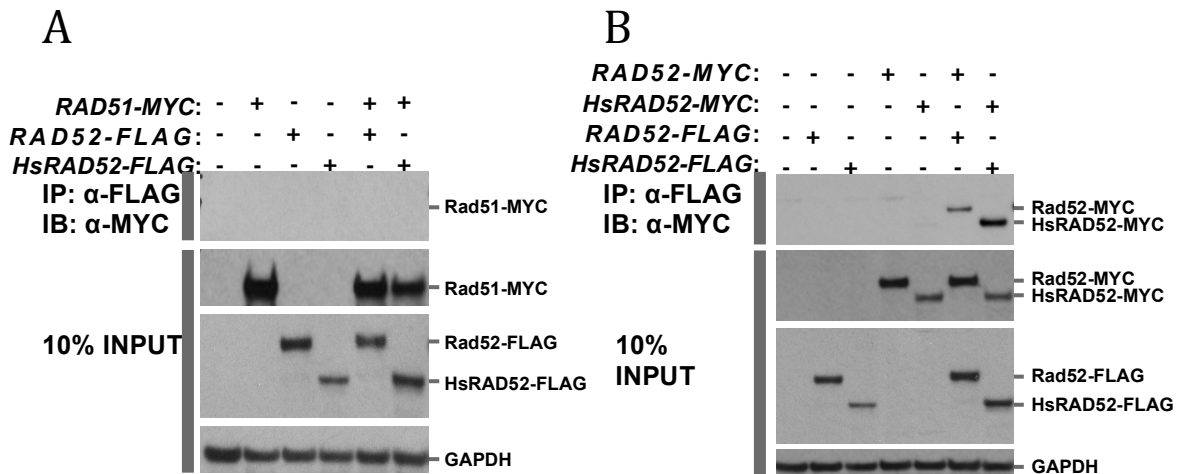

**Supplementary Figure 5: Co-immunoprecipitation analysis of intermolecular interactions between Rad51, Rad52 and HsRAD52**

Whole cell extracts were prepared from haploid yeast strains with or without chromosomal copies of *RAD52-FLAG*, or *adh1::HsRAD52-FLAG*, and with or without plasmid-borne copies of *RAD51-MYC*, *RAD52-MYC*, or *adh1::HsRAD52-FLAG*. Aliquots of extracts were exposed to anti-FLAG antibody, and the immunoprecipitated proteins separated on gels, electroblotted, and probed with anti-MYC antibody. Aliquots of extract 10% of the volume submitted to immunoprecipitation were run directly on gels, electroblotted, and probed with anti-MYC, anti-FLAG or anti-GAPDH antibodies. Proteins were visualized by treating blots with HRP-conjugated secondary antibodies and chemiluminescent detection reagents, and exposure to X-ray film.

**A. Yeast Rad52 protein can interact with yeast Rad51 protein but human RAD52 protein cannot** Presence of genomic copies of the *RAD52-FLAG* or *HsRAD52-FLAG* fusion genes, and/or a plasmid copy of *RAD51-MYC* in the yeast strains used to make the whole cell extracts are denoted with a (+) at the top of the figure. The top panel depicts proteins immunoprecipitated (IP) by anti-FLAG antibody and immunoblotted (IB) with anti-MYC antibody. The bottom three panels depict the proteins in 10% INPUT. Signals corresponding to the 55 kDa Rad52-FLAG, 49 kDa HsRAD52-FLAG, 44 kDa Rad51-MYC, and 37 kDa GAPDH proteins are denoted on the right side of the figure.

**B. Both the yeast Rad52 and human RAD52 proteins self-interact** Presence of genomic copies of the *RAD52-FLAG* or *HsRAD52-FLAG* fusion genes, and/or plasmid copies of *RAD52-MYC* or *HsRAD52-MYC* in the yeast strains used to make the whole cell extracts are denoted with a (+) at the top of the figure. The top panel depicts proteins immunoprecipitated (IP) by anti-FLAG antibody and immunoblotted (IB) with anti-MYC antibody. The bottom three panels depict the proteins in 10% INPUT. Signals corresponding to the 55 kDa Rad52-FLAG, 49 kDa HsRAD52-FLAG, 53 kDa Rad52-MYC, 47 kDa HsRAD52-MYC, and 37 kDa GAPDH proteins are denoted on the right side of the figure.
